# Supplementary material for: Human iPS cells engender corneal epithelial stem cells with holoclone-forming capabilities
Source: PubMed Central journal article supplement — iScience. 2021 Jun 5;24(6):102688. doi: 10.1016/j.isci.2021.102688 (PMC8233200; doi:10.1016/j.isci.2021.102688), 2021-06-05

**iScience, Volume 24**

**Supplemental information**

**Human iPS cells engender**

**corneal epithelial stem cells**

**with holoclone-forming capabilities**

**Shinya Watanabe, Ryuhei Hayashi, Yuzuru Sasamoto, Motokazu Tsujikawa, Bruce R. Ksander, Markus H. Frank, Andrew J. Quantock, Natasha Y. Frank, and Kohji Nishida**

**Figure S1. Schematic representation of the holoclone assay, Related to Figure 2.**

**a**, Schematic representation of the holoclone assay and the definition of a holoclone and a non-holoclone (n = 8 independent experiments). **b**, Representative images of proliferative and non-proliferative colonies. Arrowheads indicate compressed feeder cells. Scale bars, 500  $\mu\text{m}$ .

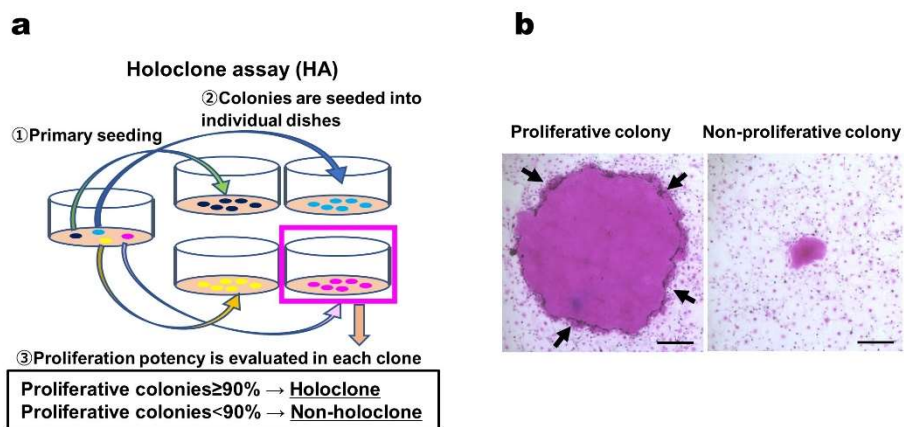

Supplement: mmc1.pdf [file mmc1.pdf]
